# Supplementary material for: Transforming Growth Factor-β Activated Kinase 1 (Tak1) Is Activated in Hepatocellular Carcinoma, Mediates Tumor Progression, and Predicts Unfavorable Outcome
Source: MDPI journal article supplement (doi:10.3390/cancers14020430), 2022-01-15
Supplement: s1 [file s1]

Supplementary materials

# Transforming growth factor- $\beta$ activated kinase 1 (Tak1) is activated in hepatocellular carcinoma, mediates tumor progression and predicts unfavorable outcome

Dirk Andreas Ridder, Lana Louisa Urbansky, Hagen Roland Witzel, Mario Schindeldecker, Arndt Weinmann, Kristina Berndt, Tiemo Sven Gerber, Bruno Christian Köhler, Federico Nichetti, Nadine Gehrke, Jörn Schattenberg, Stefan Heinrich, Wilfried Roth, and Beate Katharina Straub

**Table S1.** List of antibodies used for immunohistochemistry.

| Antibody                | Supplier    | Cat. Nr. | Type              | Dilution     | Antigen Retrieval      |
|-------------------------|-------------|----------|-------------------|--------------|------------------------|
| Anti-cleaved Caspase-3  | Cell Signal | 9664     | rabbit monoclonal | 1:200        | citrate buffer, pH 6.1 |
| Anti-CD34               | Dako        | IR632    | mouse monoclonal  | ready to use | Tris/EDTA buffer, pH 9 |
| Anti-Ki67               | Dako        | IR626    | mouse monoclonal  | ready to use | citrate buffer, pH 6.1 |
| Anti-Tak1               | Novusbio    | JM73-19  | rabbit monoclonal | 1:25         | citrate buffer, pH 6.1 |
| Anti-Cyld               | Abcam       | ab137524 | rabbit polyclonal | 1:400        | citrate buffer, pH 6.1 |
| Anti-Glutaminsynthetase | Roche       | 760-4898 | mouse monoclonal  | ready to use | Roche, #950-124        |

**Table S2.** Crude nutrients of experimental diets (both ssniff Spezialdiäten GmbH, Soest, Germany).

| Product No.                    |       | Surwit Diet (HFD) [HF/Sucrose]<br>E15772-34 | Control Diet (CD)[Soybean Oil]<br>E15772-04 |
|--------------------------------|-------|---------------------------------------------|---------------------------------------------|
| Casein                         | %     | 23.00                                       | 23.00                                       |
| Corn starch, pre-gelatinized   | %     | -                                           | 27.00                                       |
| Maltodextrin                   | %     | 15.30                                       | 15.30                                       |
| Sucrose                        | %     | 17.00                                       | 17.00                                       |
| Pur. Cellulose powder          | %     | 1.80                                        | 5.20                                        |
| DL-Methionine                  | %     | 0.10                                        | 0.10                                        |
| L-Cystine                      | %     | 0.10                                        | 0.10                                        |
| Mineral & trace element premix | %     | 5.50                                        | 5.50                                        |
| Vitamin premix                 | %     | 1.00                                        | 1.00                                        |
| Sodium phosphate, dibasic      | %     | 0.30                                        | 0.30                                        |
| Dye, red-yellow mix            | %     | 0.10                                        | -                                           |
| Choline chloride               | %     | 0.20                                        | 0.20                                        |
| Coconut oil, hydrogenated      | %     | 33.30                                       | -                                           |
| Soybean oil                    | %     | 2.30                                        | 5.30                                        |
| ME, Atwater *                  | MJ/kg | 22.80                                       | 15.70                                       |
| Protein                        | kJ%   | 15                                          | 22                                          |
| Carbohydrates                  | kJ%   | 26                                          | 65                                          |
| Lipids                         | kJ%   | 58                                          | 13                                          |

\* physiological fuel value.
